# Supplementary material for: Endothelial Cell-Derived TGF-β Promotes Epithelial-Mesenchymal Transition via CD133 in HBx-Infected Hepatoma Cells
Source: PubMed Central journal article supplement (PMC6491671; doi:10.3389/fonc.2019.00308), 2019-04-24
Supplement: Table_1.pdf [file Table_1.pdf]

Table S1: List of Forward and Reverse primer sequences used for the analysis of mRNA expression in the study..

| S.No | GENE NAME | FORWARD SEQUENCE            | REVERSE SEQUENCE            |
|------|-----------|-----------------------------|-----------------------------|
| 1.   | 18 s      | 5' GTAACCCGTTGAACCCATT 3'   | 5' CCATCCAATCGGTAGTAGCG 3'  |
| 2.   | Thy-1     | 5'GCTGCTTCTGTCTGGTTTAT 3'   | 5' ACTCCTCATCCAAGTCTCTC 3'  |
| 3.   | VIM       | 5'CAGATGCGTGAAATGGAAGA 3'   | 5'TGGAAGAGGCAGAGAAATCC 3'   |
| 4..  | CDH1      | 5'CCCCCTGTTGGTGTCTTTATT 3'  | 5'ATTCGGGCTTGTTGTCATTC 3'   |
| 5.   | CDH2      | 5'GCTCCCTTAATTCCTCAAGTAG 3' | 5'TCATCACCTCCACCATACA 3'    |
| 6.   | CD133     | 5' CCACATGCTACATCCAGATAC 3' | 5'CCAGGACACAGCATAGAATAAT 3' |
| 7.   | TGFβR1    | 5'GCTGTATTGCAGACTTAGGACT 3' | 5'TTTTTGTTCCCACTCTGTGGTT 3' |
